# Supplementary material
Source: PubMed Central journal article supplement (PMC6439702)

## Supplementary Online Content

Stefan MS, Shieh M-S, Spitzer KA, et al. Association of antibiotic treatment with outcomes in patients hospitalized for an asthma exacerbation treated with systemic corticosteroids. *JAMA Intern Med*. Published online January 28, 2019. doi:10.1001/jamainternmed.2018.5394

**eFigure.** Flow Chart With Patients Excluded From the Cohort Analyzed

This supplementary material has been provided by the authors to give readers additional information about their work.

**eFigure.** Flow Chart With Patients Excluded From the Cohort Analyzed

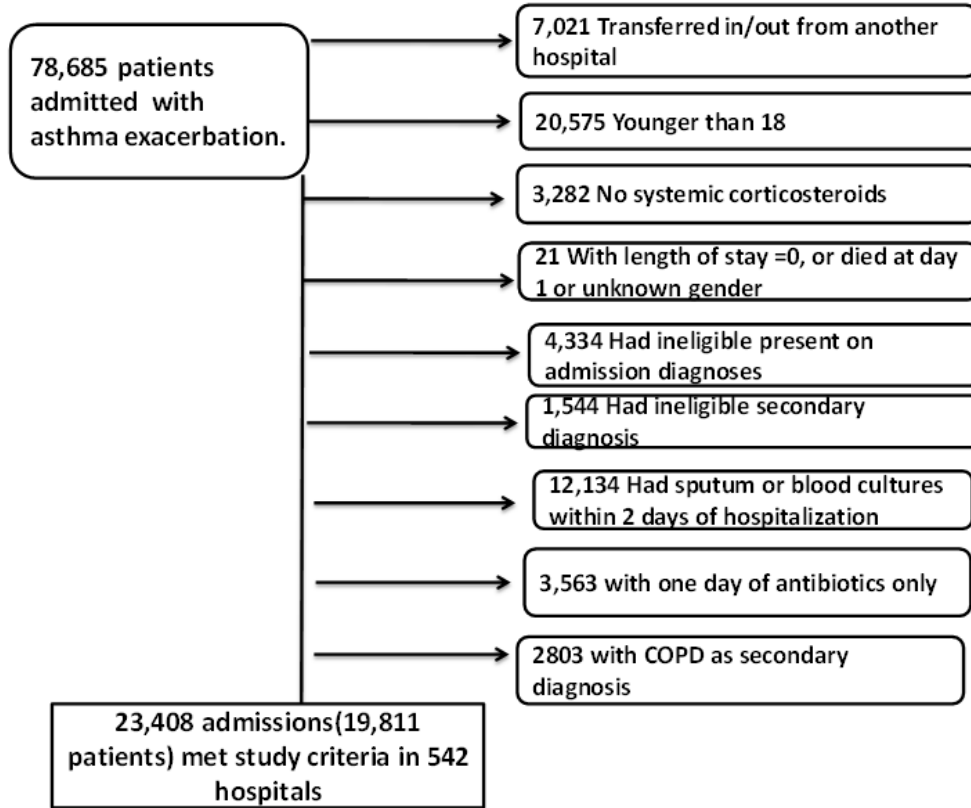

Supplement: jamainternmed-179-333-s001.pdf [file jamainternmed-179-333-s001.pdf]
